# Supplementary material
Source: PubMed Central journal article supplement (PMC3928718)
Supplement: NIHMS56838-supplement-3.pdf [file NIHMS56838-supplement-3.pdf]

## Supplementary Data

SUPPLEMENTARY TABLE S1. PRIMER SEQUENCES FOR QUANTITATIVE REVERSE  
TRANSCRIPTASE-POLYMERASE CHAIN REACTION ANALYSIS

| <i>Gene symbol</i> | <i>Accession no.</i> | <i>Forward primer</i>     | <i>Reverse primer</i>     |
|--------------------|----------------------|---------------------------|---------------------------|
| <i>Arx</i>         | NM_007492.3          | CCAAC TCAAAGTCCACTCTCCCGT | GTTTAGCCGGGCCGCGCTTA      |
| <i>Cer1</i>        | NM_009887.2          | CTTTCTTTTAGGCCCGTCCATC    | CCAGAGGCAAGAGAACAAGCAG    |
| <i>Chordin</i>     | NM_009893            | GGCGTGGTAAAAGATCTGGA      | CACTCCTTCTGAGGCCAGAC      |
| <i>Flk1</i>        | NM_010612.2          | CTGACTACACTACCCAGAAA      | ACTTCCTCTCCTCCATACAG      |
| <i>Foxa2</i>       | NM_010446.1          | GCTGCAGACACTTCTACTAC      | GGACACAGACAGGTGAGACT      |
| <i>Foxj1</i>       | NM_008240.3          | GCCGGCACATCAACTGCCCT      | TGCTGTAGGAAGGATGTGCCCA    |
| <i>Gsc</i>         | NM_010351.1          | GGAGAAGGTGGAGGTCTGGTTT    | CACTTCTCGGCGTTTTCTGACT    |
| <i>Lim1</i>        | NM_008498.2          | ACGGAGATTACCAGAGTGAGT     | ATGTGCCAGGATGTCAGTA       |
| <i>Mesp1</i>       | NM_008588.1          | CGTTCAGTACGCAGAAACA       | CAATCATCCGTTGCATTGTC      |
| <i>Nodal</i>       | NM_013611.3          | AGGAGGGTCAAGTTCAGGT       | GCTCTGGATGTAGGCATGGT      |
| <i>Noggin</i>      | NM_008711.2          | CGGCCAGCACTATCTACACA      | GCGTCTCGTTCAGATCCTTC      |
| <i>Noto</i>        | NM_001007472.1       | GCTGCAAGAGTTGGAGAAGG      | TTTGGAACCAGATCCTCACC      |
| <i>Otx2</i>        | NM_144841            | GTCCCAACCSTTGCCAGCAGCAGT  | CCAGCCATCTCAATCAGTCCCCAGC |
| <i>Shh</i>         | NM_009170.3          | AGAAACTCCGAACGATTTAAG     | GCCAGCATGCCATACTTGCTG     |
| <i>Sox17</i>       | NM_011441.2          | GGAGGGTCACCACTGCTTTA      | TCAGATGTCTGGAGGTGCTG      |
| <i>T</i>           | NM_009309.2          | GAACAGCTCTCCAACCTATG      | AGACTGGGATACTGGCTAGAG     |

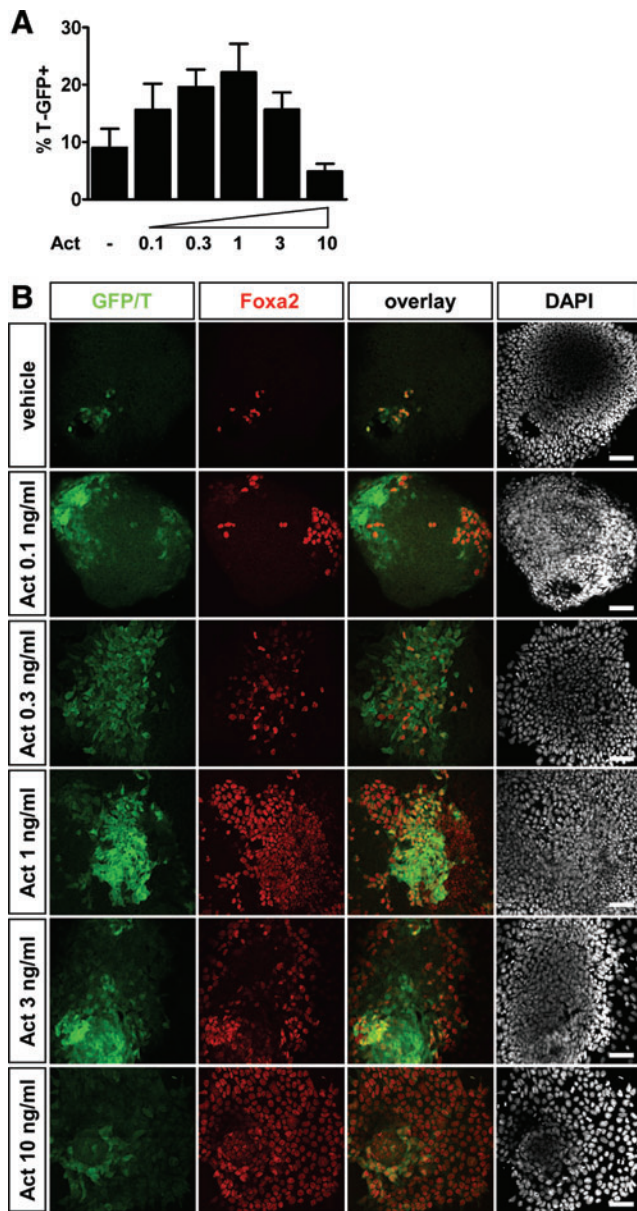

**SUPPLEMENTARY FIG. S1.** Low levels of Activin A induce a Foxa2<sup>+</sup>/T<sup>+</sup> population. **(A)** FACS analysis of T-GFP expression after 4 days of culture in the presence of different Activin A concentrations ranging from 0.1 to 10 ng/mL. The data represent the mean ± standard deviation of 3 experiments. **(B)** Immunocytochemistry of Foxa2 (red) and GFP (green) in T<sup>GFP/+</sup> cells cultured for 4 days in the presence of different Activin A concentrations. The nuclei were stained with DAPI (white). Scale bar = 50 μm. FACS, fluorescence-activated cell sorting.

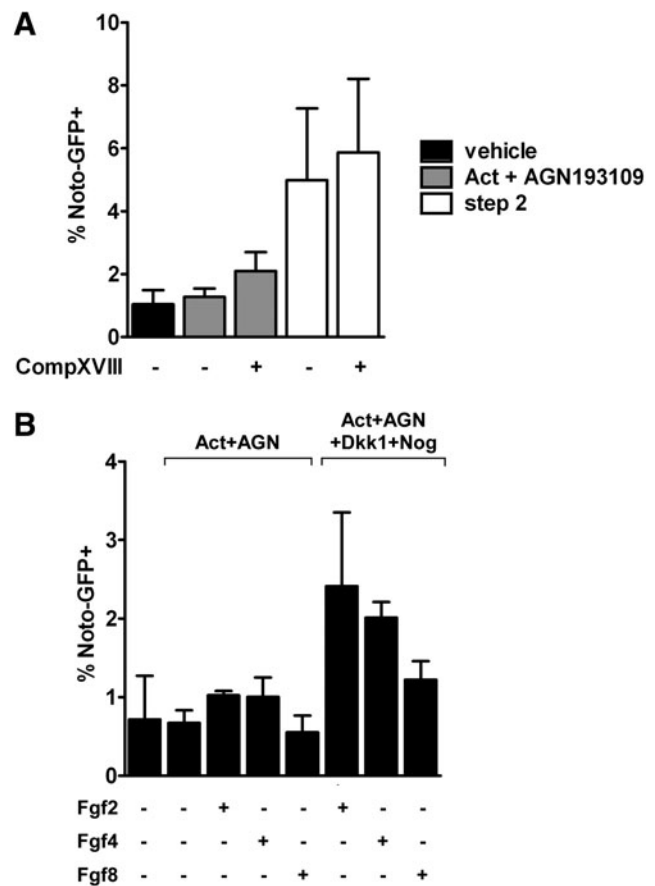

**SUPPLEMENTARY FIG. S2.** Notch, Fgf4, and Fgf8 do not increase differentiation into Noto-GFP<sup>+</sup> cells. FACS analysis of Noto-GFP expression at day 5 of differentiation. After Noto<sup>Gfp/+</sup> ES cells were cultured for 3 days in 1 ng/mL Activin A, the medium was additionally supplemented with different growth factor combinations **(A)** in the presence or absence of the Notch inhibitor: 10 μM Compound XVIII and **(B)** in the presence of different types of Fgfs (100 ng/mL Fgf2, 100 ng/mL Fgf4, and 100 ng/mL Fgf8). The data represent the mean ± standard deviation of at least 3 independent experiments. ES, embryonic stem.

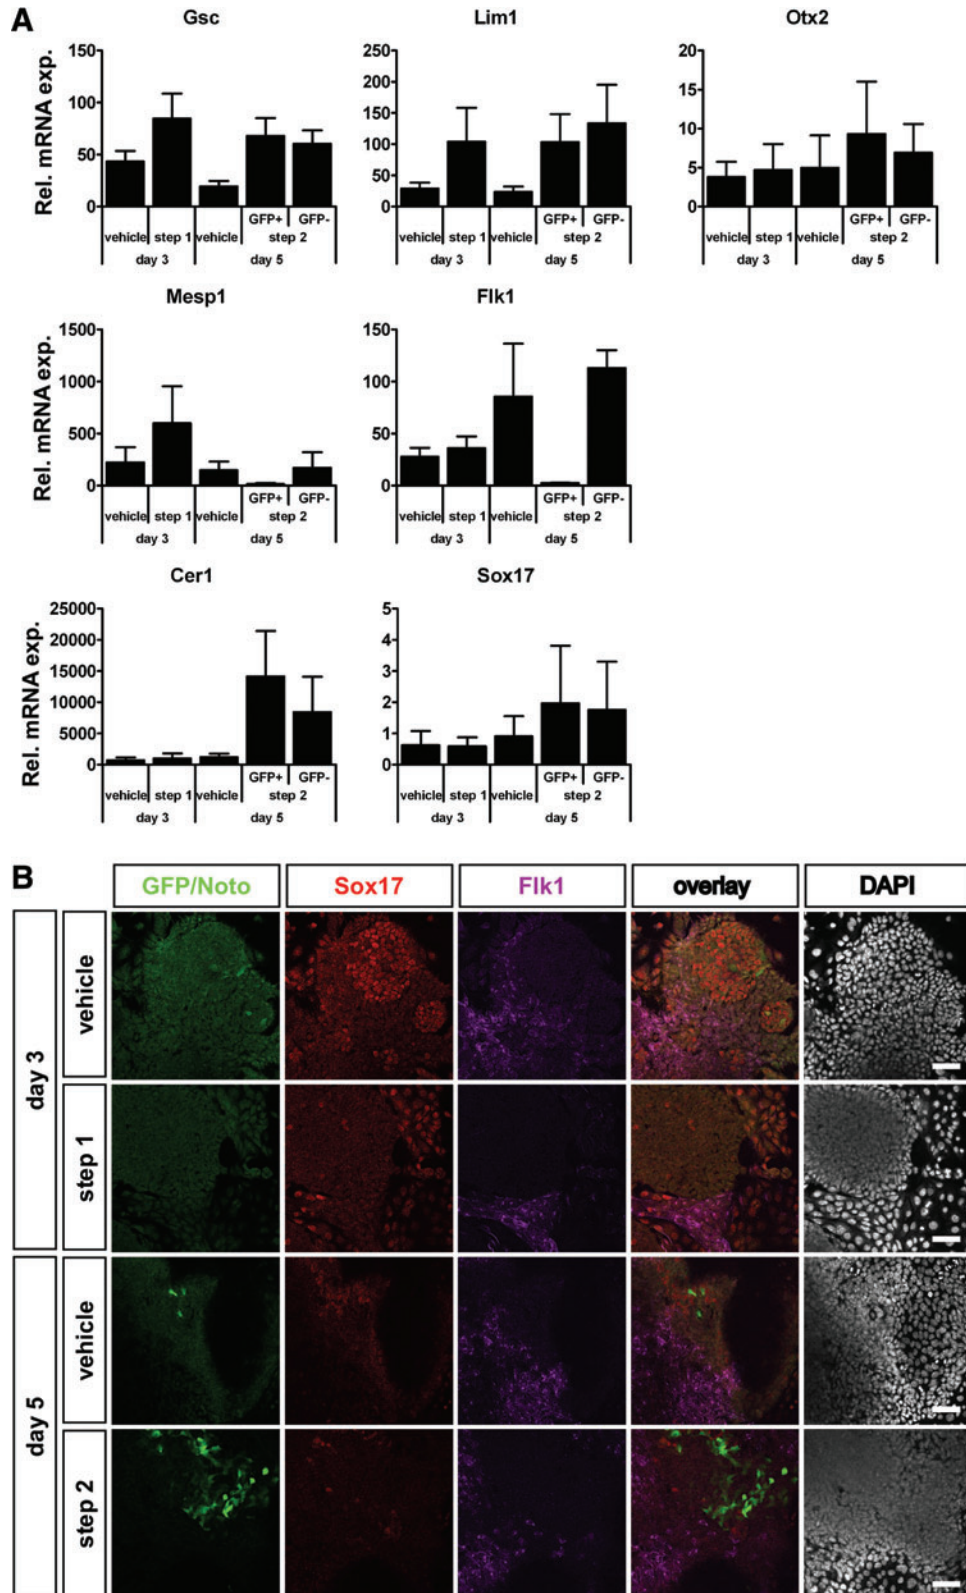

**SUPPLEMENTARY FIG. S3.** Characterization of the differentiated ES cell populations. **(A)** mRNA expression level of different markers during differentiation of  $\text{Noto}^{\text{Gfp/+}}$  ES cells with the 2-step protocol or control medium (vehicle). The expression levels of the genes were measured by real-time quantitative reverse transcriptase–polymerase chain reaction. The ratio of gene expression against undifferentiated  $\text{Noto}^{\text{Gfp/+}}$  ES cells is shown. The data represent the mean  $\pm$  standard error of the mean of at least 3 independent experiments. **(B)** Immunocytochemistry for GFP (green), Sox17 (red), and Fik1 (purple) in differentiated  $\text{Noto}^{\text{Gfp/+}}$  ES cells. Cell nuclei were stained with DAPI (white). Scale bar = 50  $\mu\text{m}$ .
